# Supplementary material
Source: PubMed Central journal article supplement (PMC2908027)
Supplement: NIHMS216044-supplement-Supp1.pdf [file NIHMS216044-supplement-Supp1.pdf]

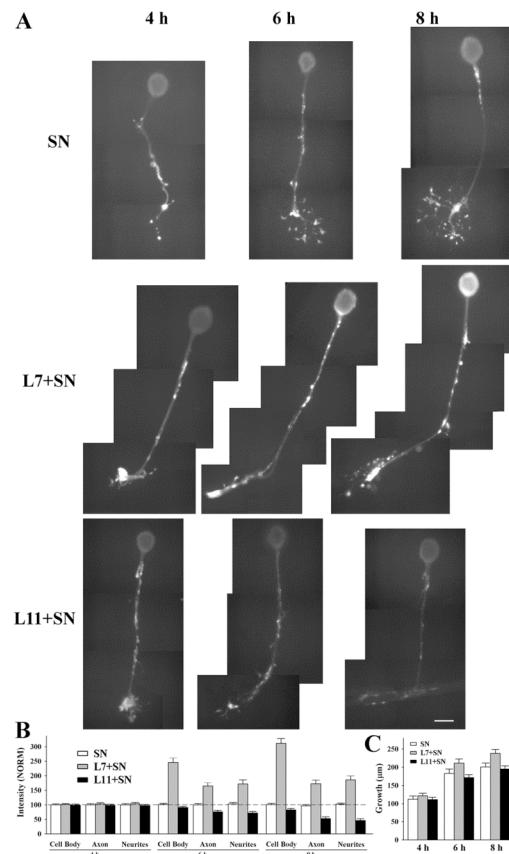

**Supplementary Figure 2:** Target-dependent differences in sensorin expression and sensory neuron axon growth emerge at 6 – 8 h in L7 + SN and L11 + SN cultures. **A.** Epifluorescent images of sensorin immunostaining in sensory neurons plated alone (SN) contacting L7 (L7 + SN) or L11 (L11 + SN) at 4 h, 6 h, and 8 h after plating each sensory neuron. Sensorin staining in all compartments of the sensory neuron was comparable at 4 h. Differences in some compartments began to emerge at 6 h with the remaining compartments showing differences at 8 h. The bar equals 50  $\mu\text{m}$ . **B.** Sensorin expression in sensory neurons contacting L7 at 6 h and 8 h, but not at 4 h, was stronger than the staining in sensory neurons contacting L11. The height of each bar is the Mean  $\pm$  SEM staining intensity for sensorin in each compartment at each time point after normalizing to the intensity values in each compartment (100%  $\pm$  SEM) of the sensory neurons plated alone at 4 h. ANOVA indicated a significant difference in staining with target over time ( $df = 16, 182$ ;  $F = 64.570$ ;  $p < 0.001$ ). Individual comparisons indicated no significant difference in staining intensity for each compartment at 4 h. Starting at 6 h, staining in sensory neurons contacting L7 ( $n = 13$ ) was significantly higher than staining in sensory neurons plated alone ( $n = 8$ ) or contacting L11 ( $n = 12$ ) in the cell body ( $p < 0.01$ ), in the axon ( $p < 0.01$ ) and in the distal neurites ( $p < 0.03$  to  $p < 0.01$ ). At 8 h staining in axons and neurites of sensory neurons plated with L11 were significantly lower than staining in those compartment of sensory neurons plated alone ( $p < 0.05$ ). **C.** Target-dependent differences in sensory neuron growth emerge at 8 h. The height of each bar is the Mean  $\pm$  SEM in the extent of neuritic growth of sensory neurons based on detectable sensorin immunochemistry in the distal neurites of the sensory neurons. ANOVA indicated that target interaction evoked a significant difference in growth ( $df = 8, 91$ ;  $F = 78.905$ ;  $p < 0.001$ ). Individual comparisons indicated that differences in growth by sensory neurons were not significant at 4 h and 6 h but were significant at 8 h ( $p < 0.05$ ).

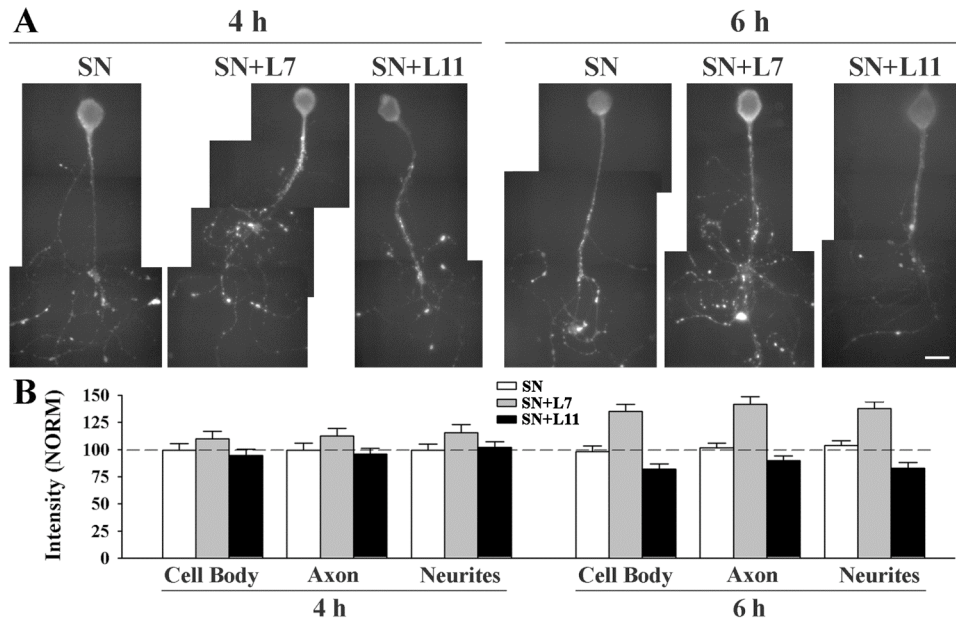

**Supplementary Figure 3:** Target-dependent differences in sensorin expression emerge at 6 h in SN + L7 and SN + L11 cultures. **A.** Epifluorescent images of sensorin immunostaining in sensory neurons plated alone (SN) contacting L7 (SN + L7) or L11 (SN + L11) at 4 h and 6 h after plating the target neurons. Sensorin staining in the sensory neuron in each culture was relatively high at 4 h, since the sensory neurons were plated more than a day earlier. Differences in staining are apparent at 6 h. The bar equals 50  $\mu$ m. **B.** Sensorin expression in sensory neurons contacting L7 (n = 12) at 6 h was greater than sensorin expression in sensory neurons plated alone (n = 8) or contacting L11 (n = 12). The height of each bar is the Mean + SEM staining intensity for sensorin in each compartment at each time point after normalizing to the intensity values in each compartment (100% + SEM) for the sensory neurons plated alone at 4 h (n = 8; n = 12 for each of the co-cultures). ANOVA indicated a significant difference of target over time. (df = 10, 118; F = 3.782, p < 0.03). Individual comparisons indicated no significant differences in staining at 4 h, but significantly strong staining at 6 h in the sensory neurons contacting L7 compared to sensory neurons plated alone or contacting L11 in the cell body (p < 0.04 or p < 0.01), axon (p < 0.03 or p < 0.01) and distal neurites (p < 0.04 or p < 0.01). Sensorin staining in the distal neurites of sensory neurons contacting L11 was significantly lower (p < 0.05) than the staining in distal neurites of sensory neurons plated alone.
